# Supplementary material for: Run-up, inundation, and sediment characteristics of the 22 December 2018 Sunda Strait tsunami, Indonesia
Source: Copernicus journal article supplement (doi:10.5194/nhess-20-933-2020), 2020-04-06

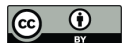

*Supplement of*

## **Run-up, inundation, and sediment characteristics of the 22 December 2018 Sunda Strait tsunami, Indonesia**

**Wahyu Widiyanto et al.**

*Correspondence to:* Shih-Chun Hsiao ([schsiao@mail.ncku.edu.tw](mailto:schsiao@mail.ncku.edu.tw))

The copyright of individual parts of the supplement might differ from the CC BY 4.0 License.

## Sand samples

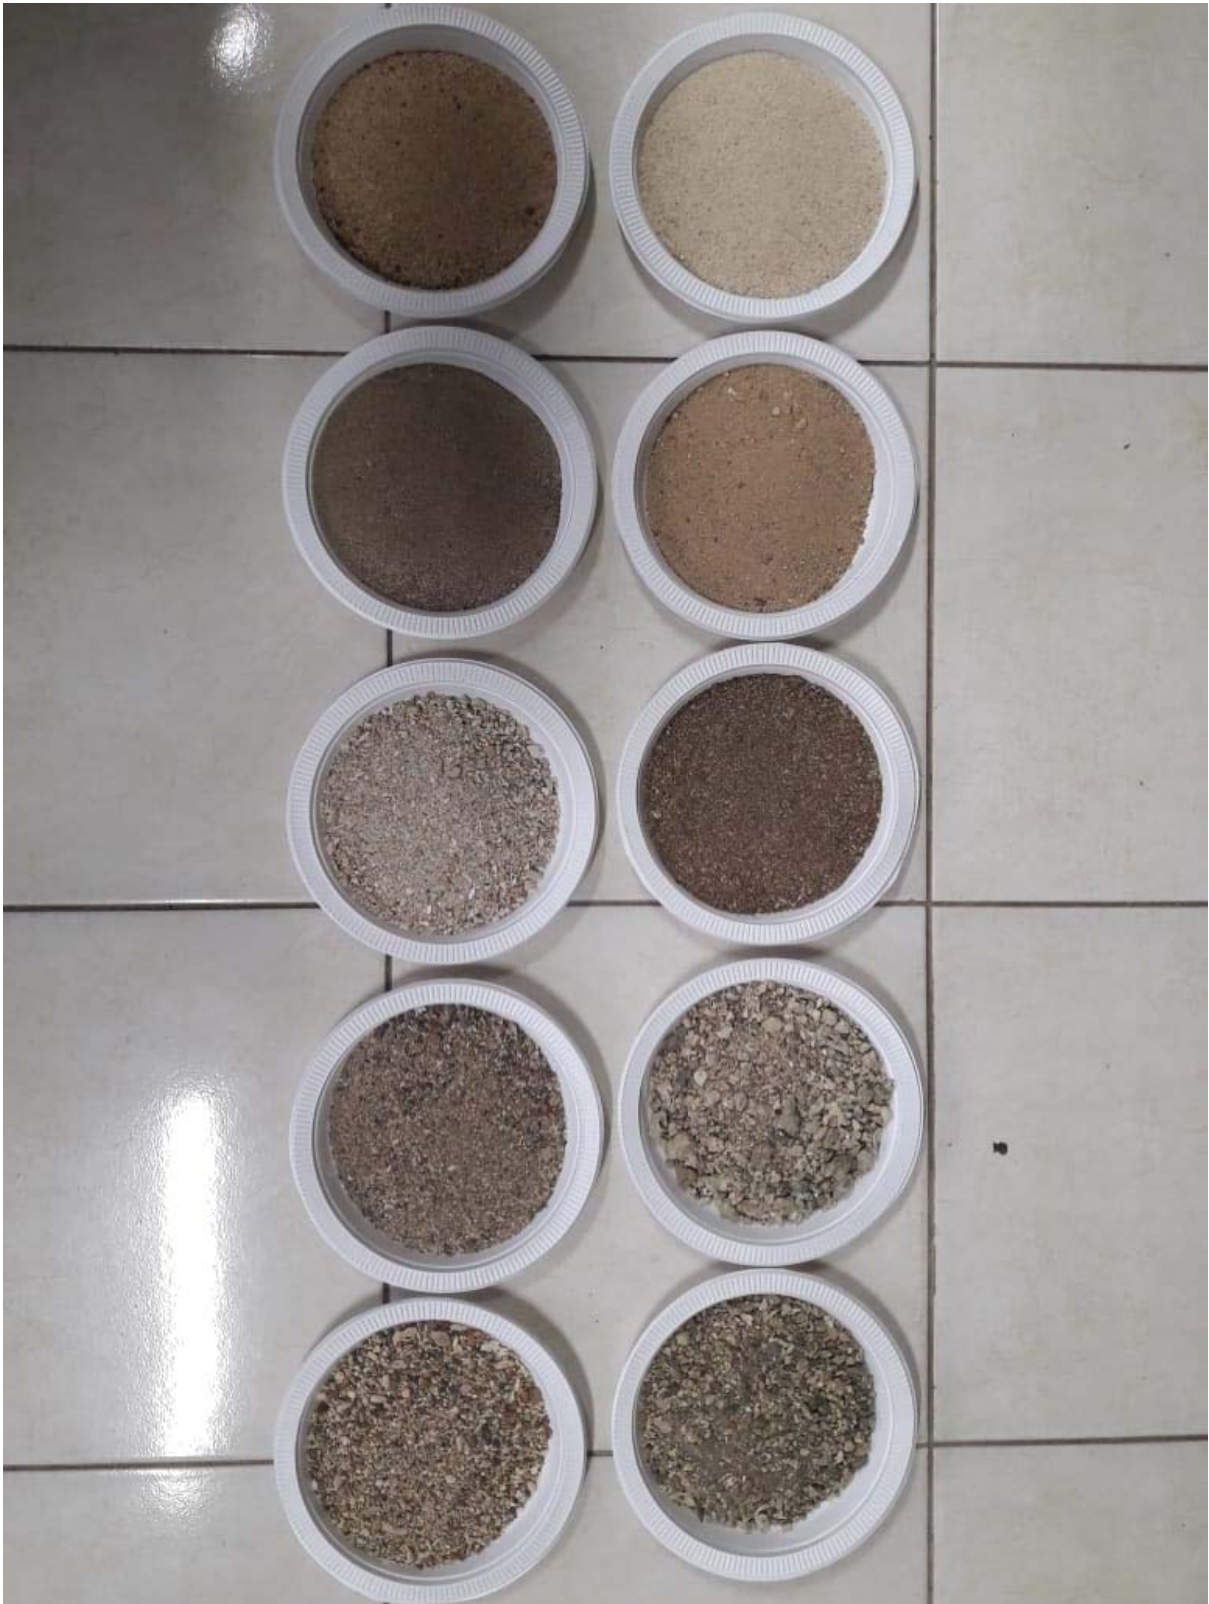



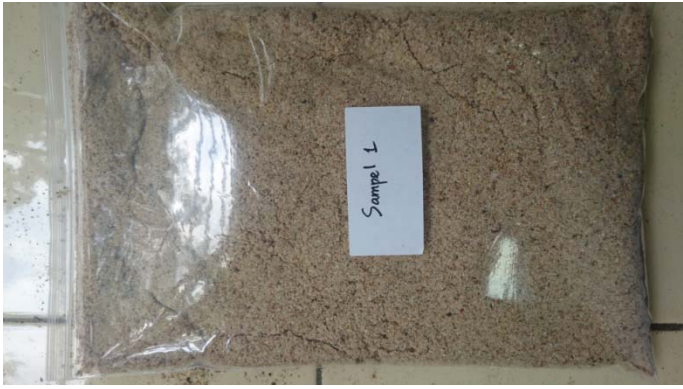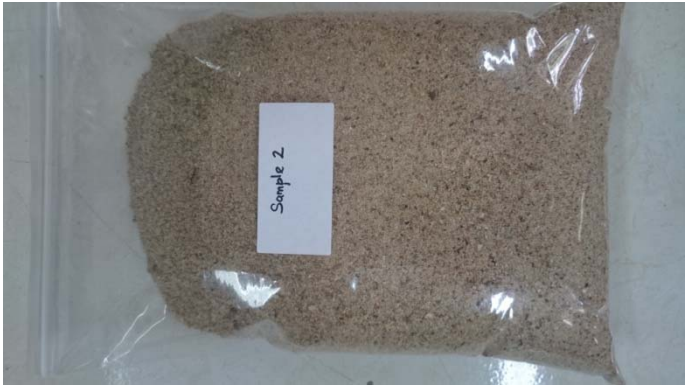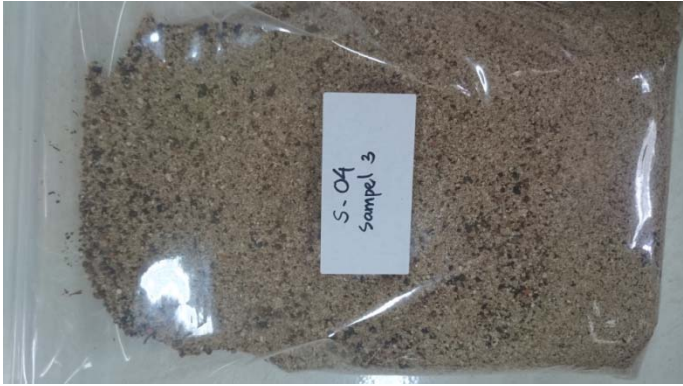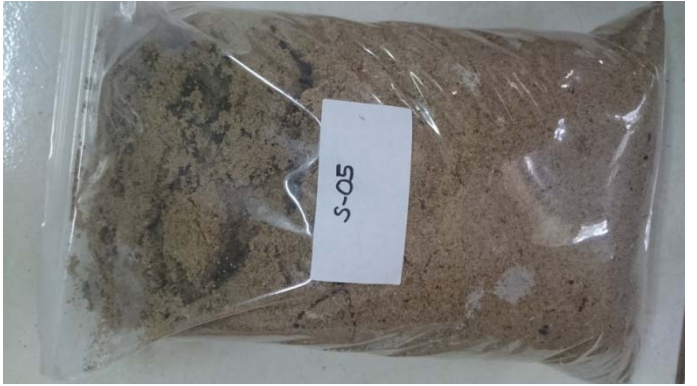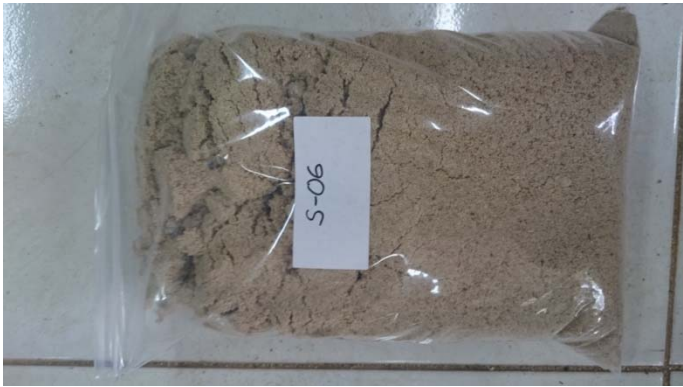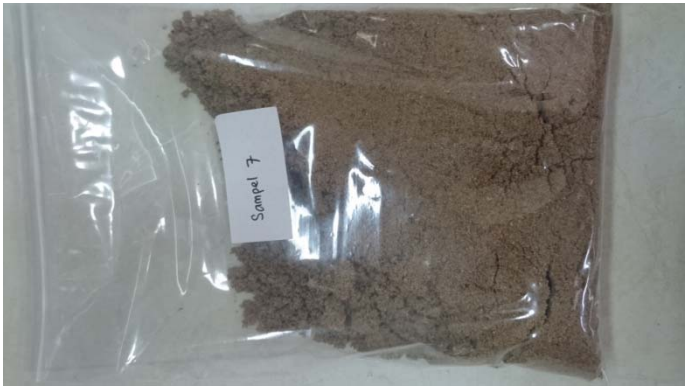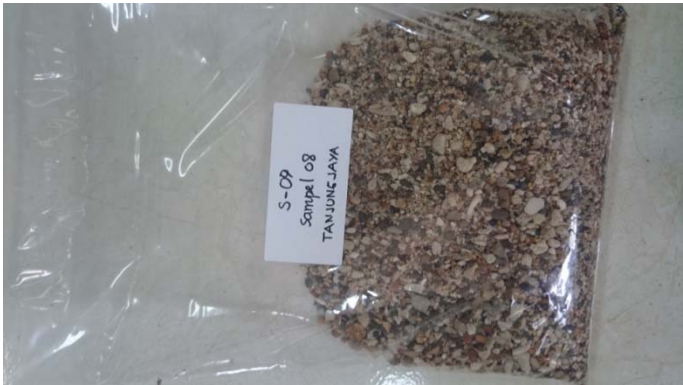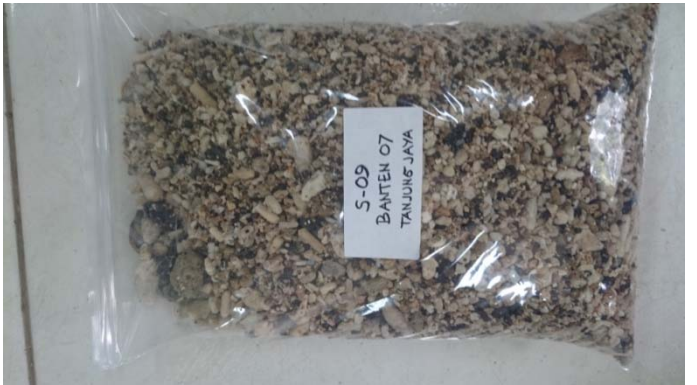



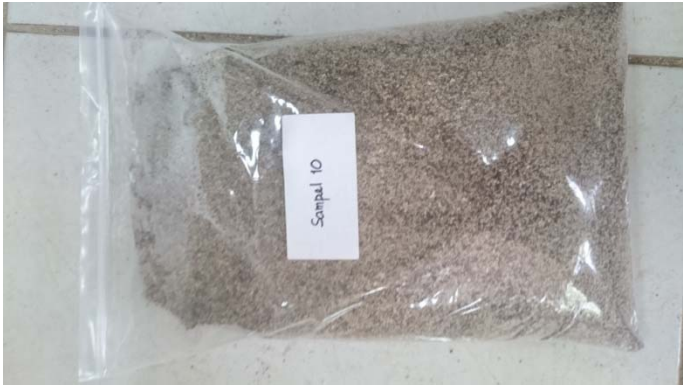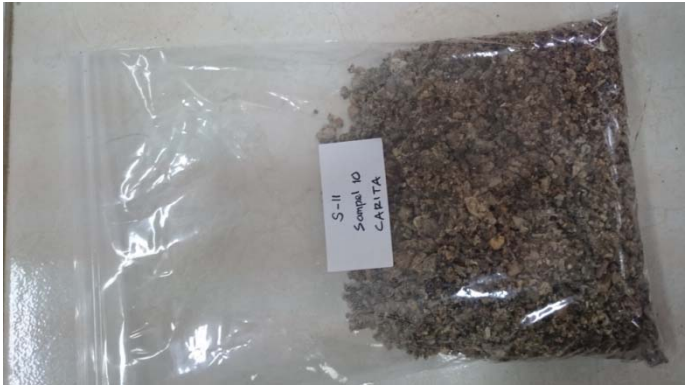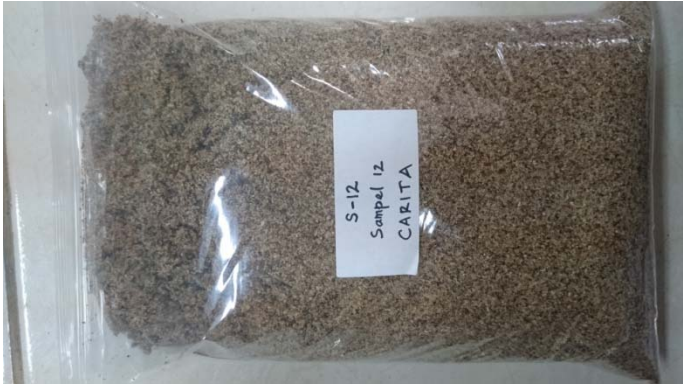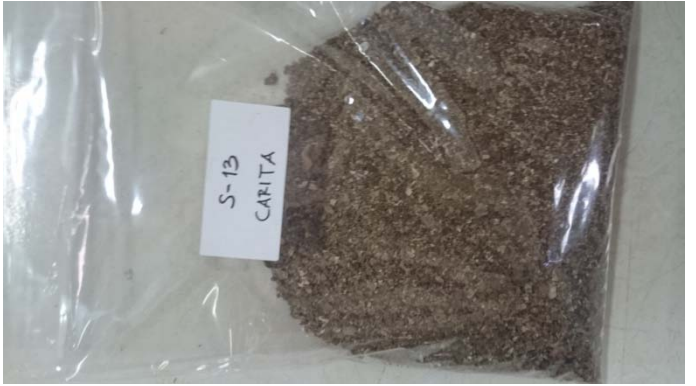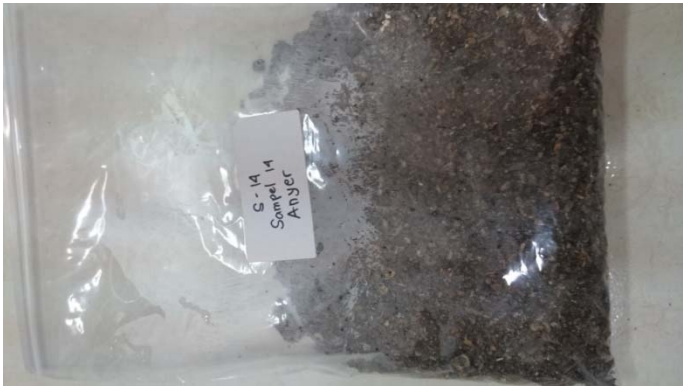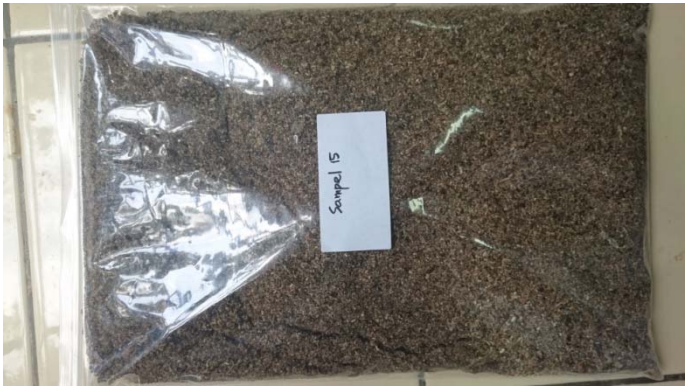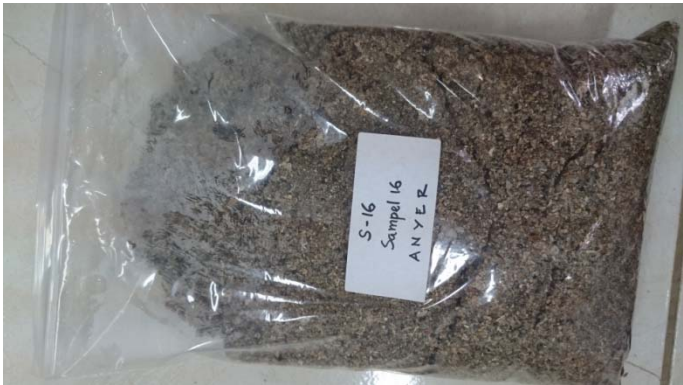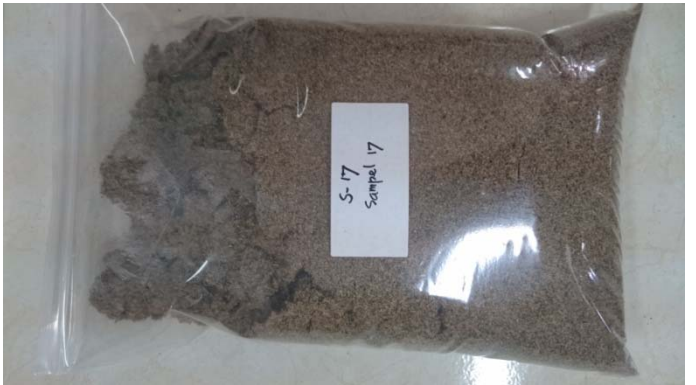



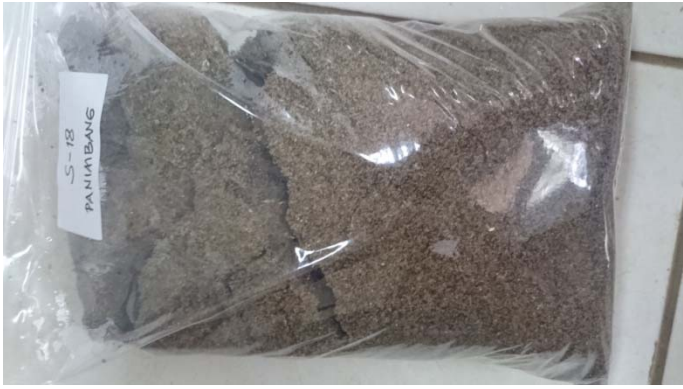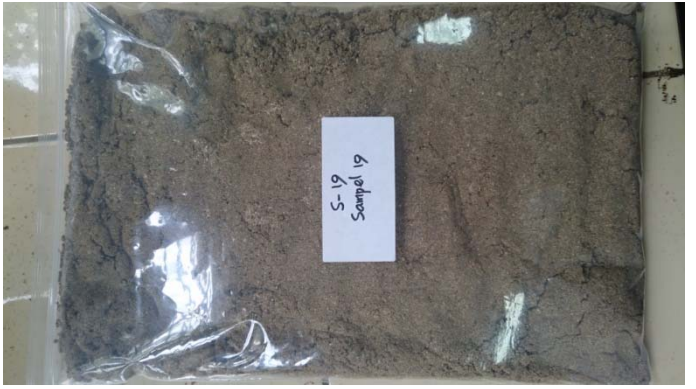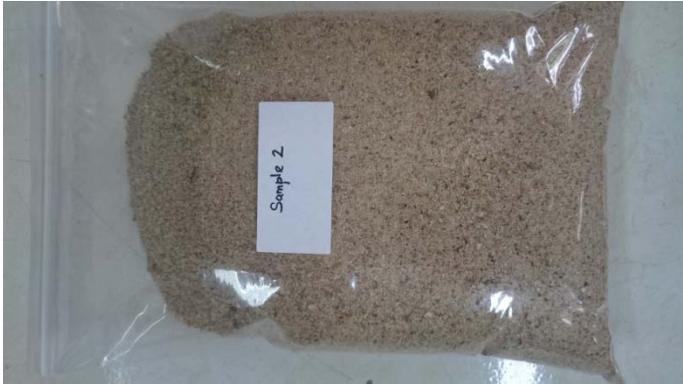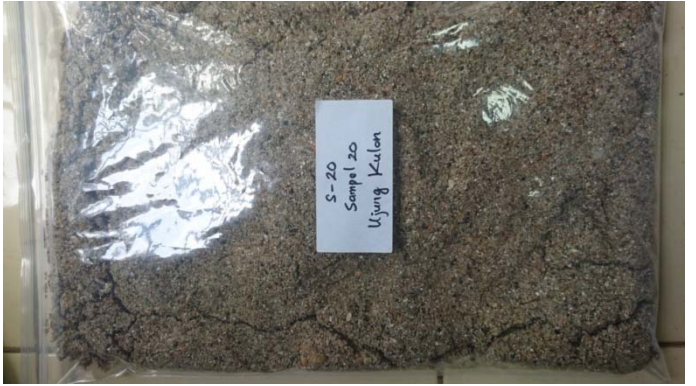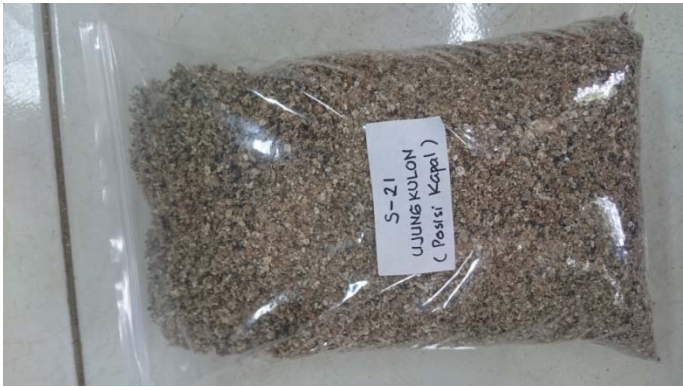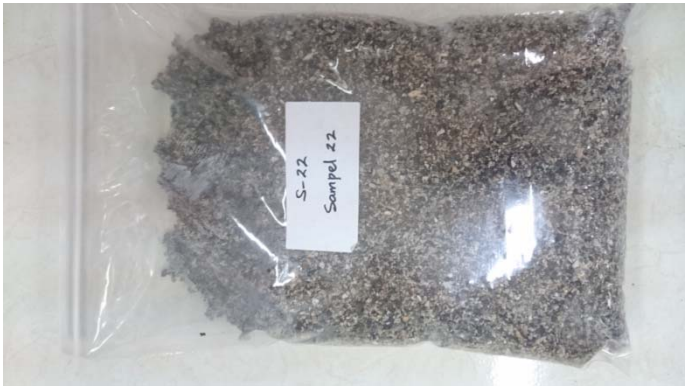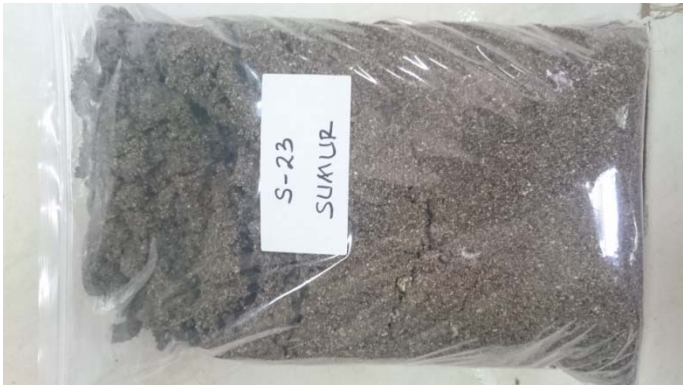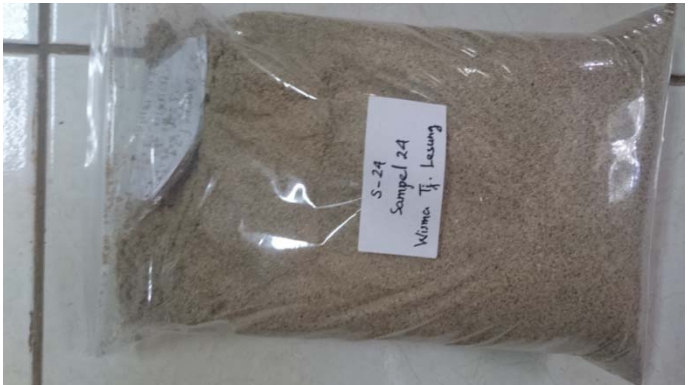



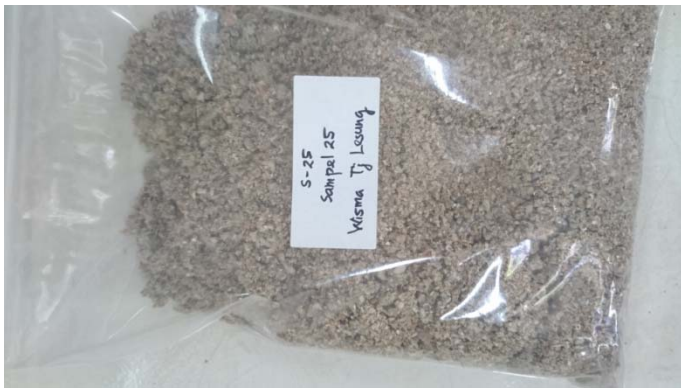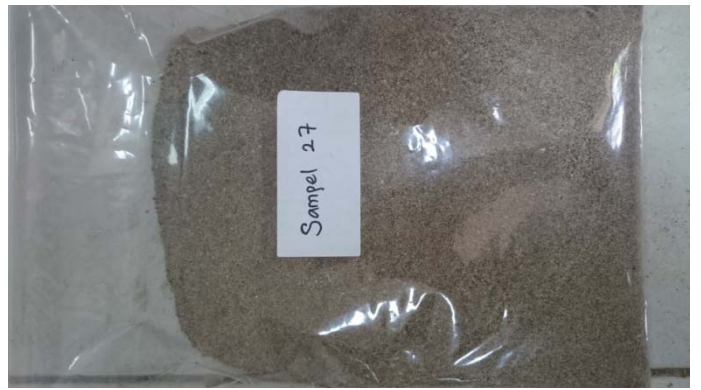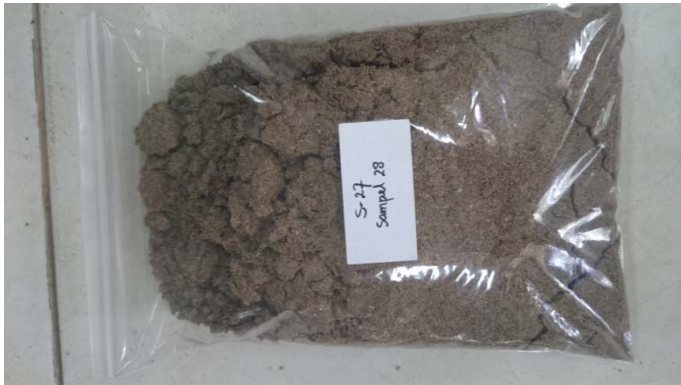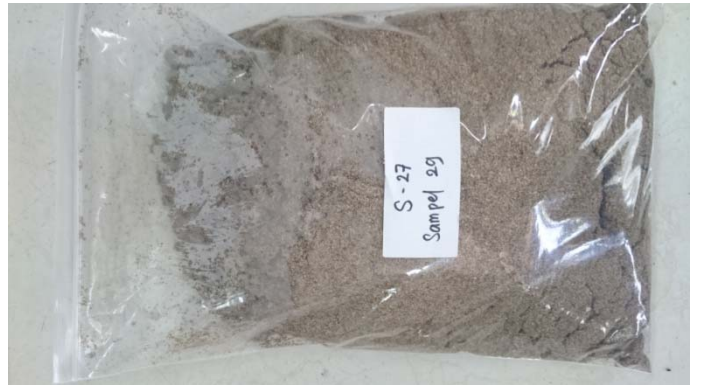

## Boulder movements

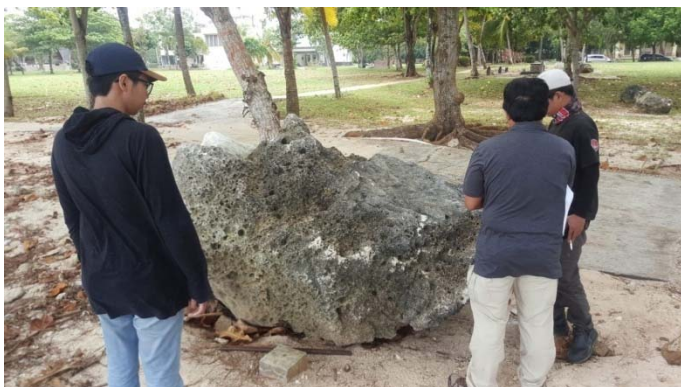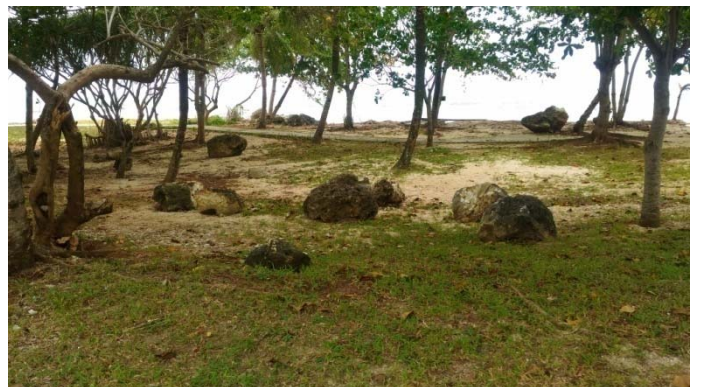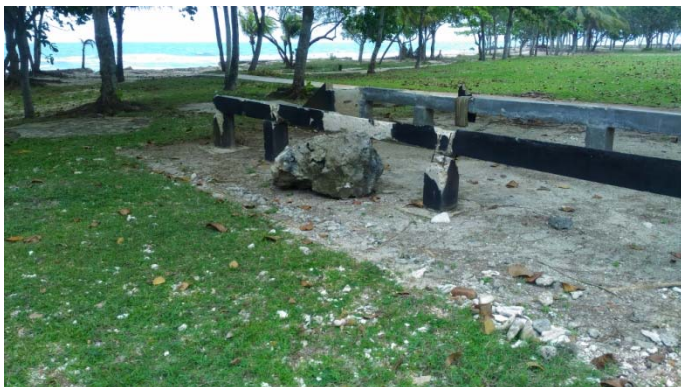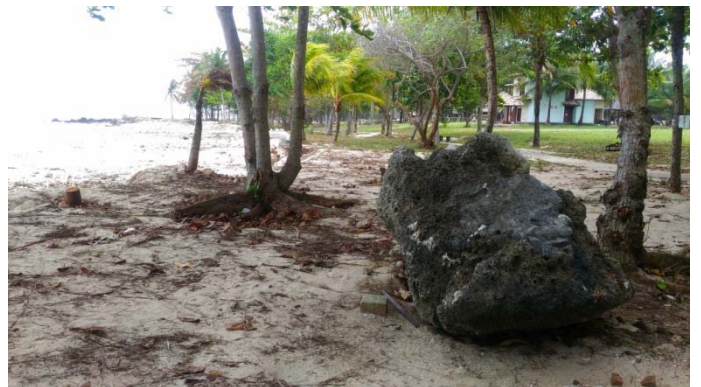



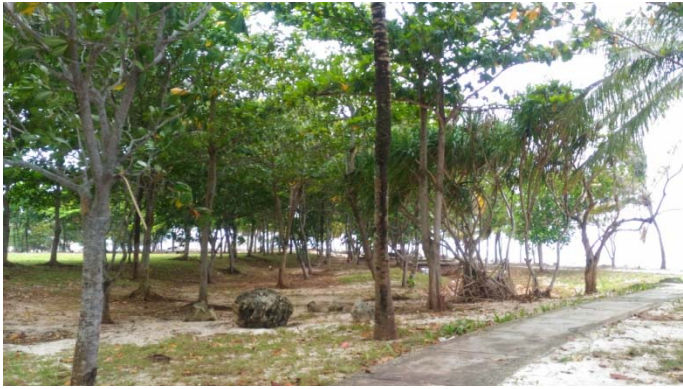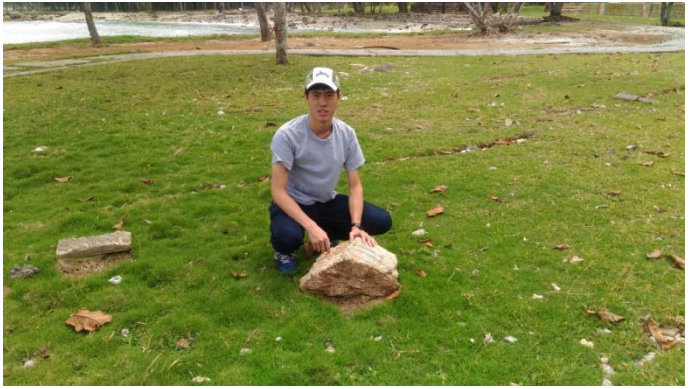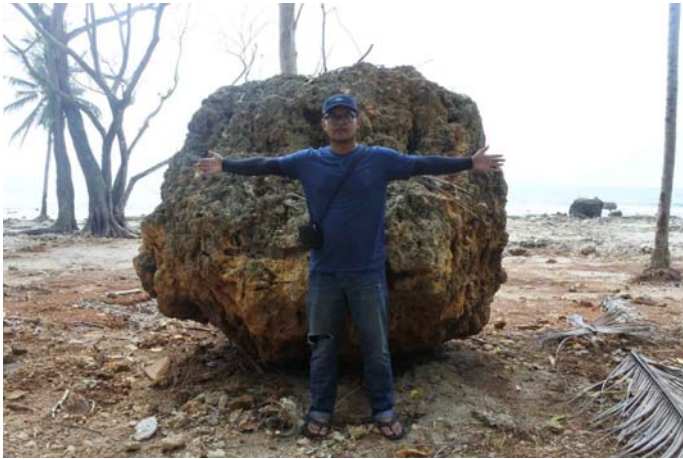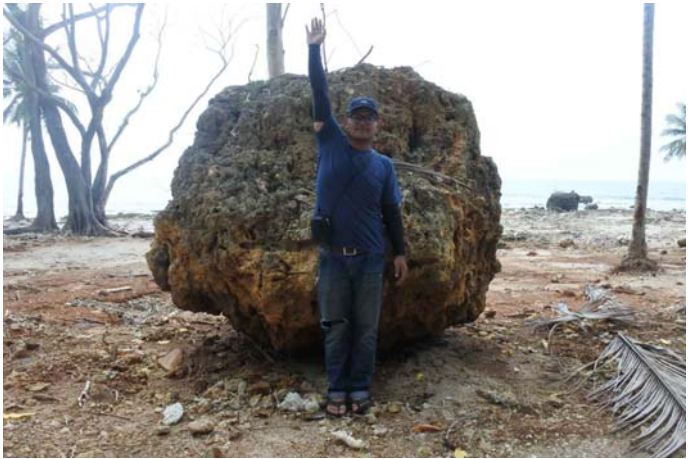

## Damages

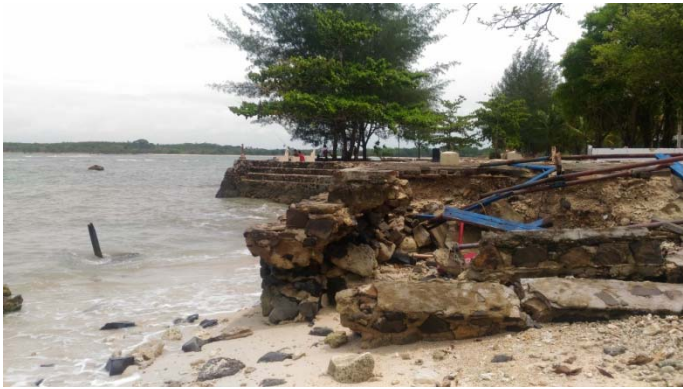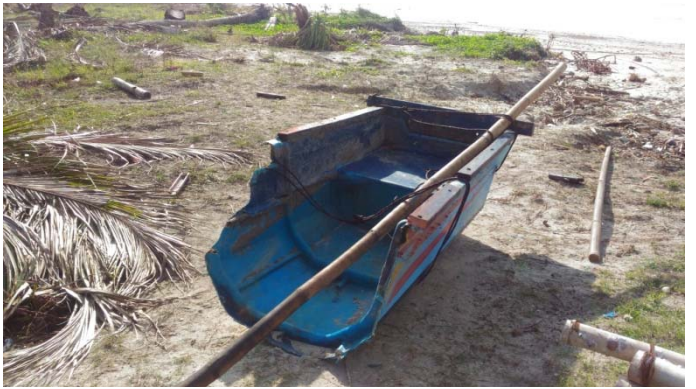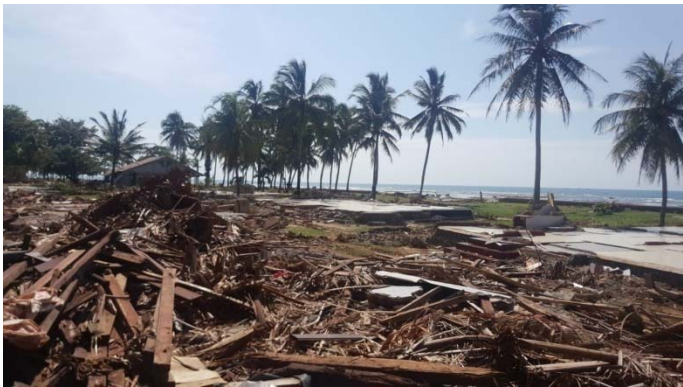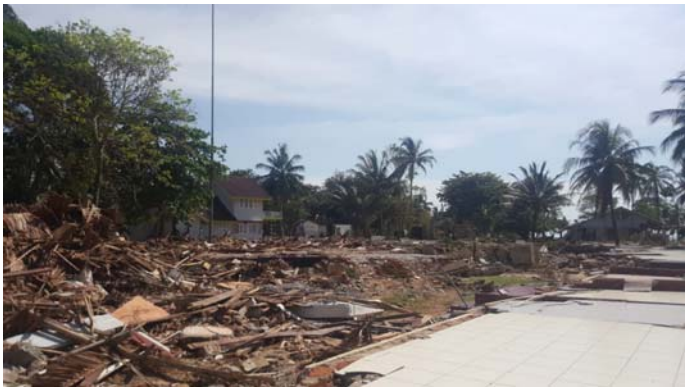



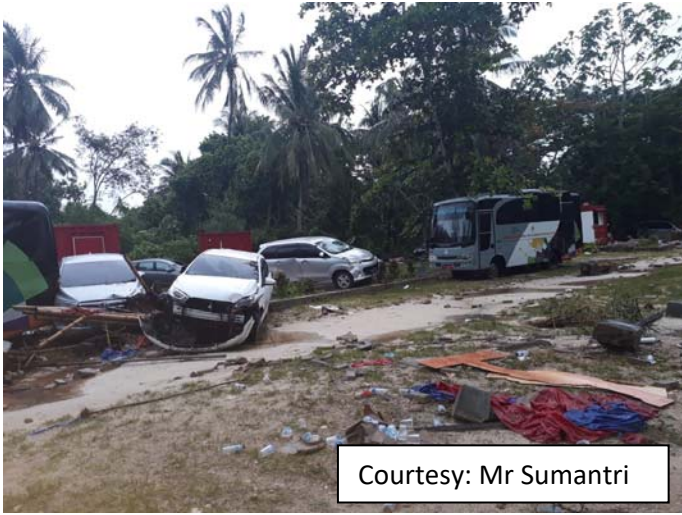

Courtesy: Mr Sumantri

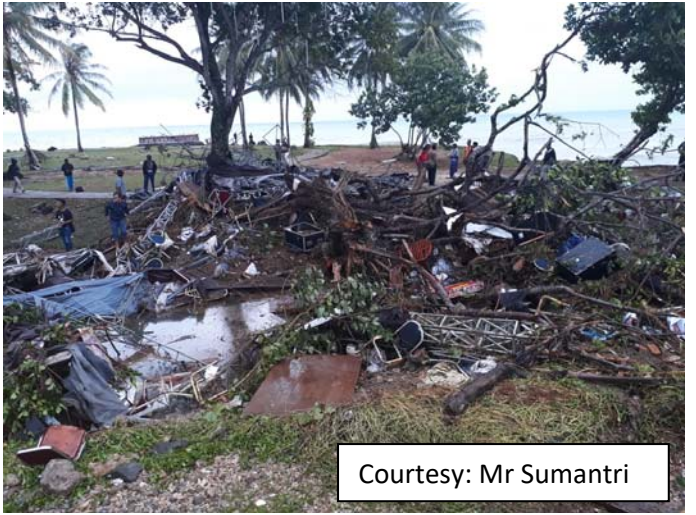

Courtesy: Mr Sumantri

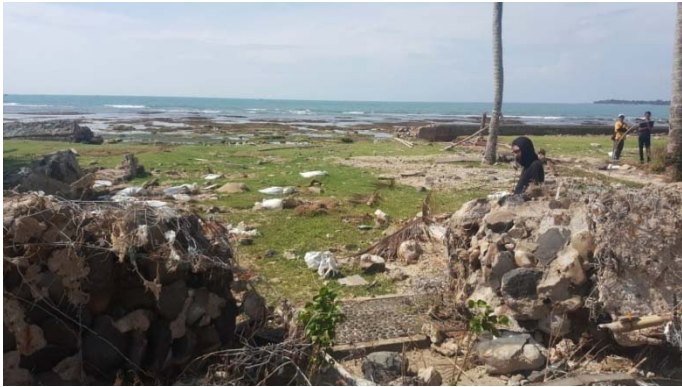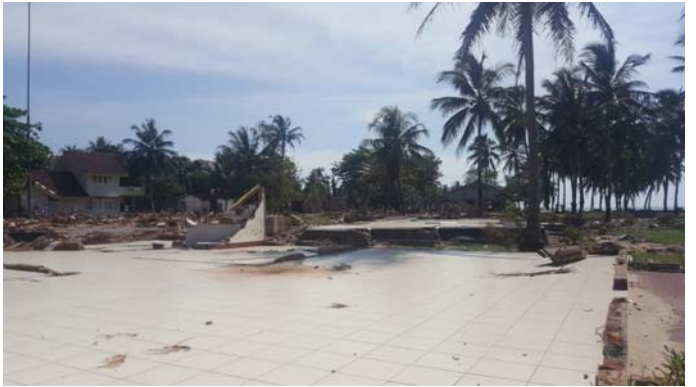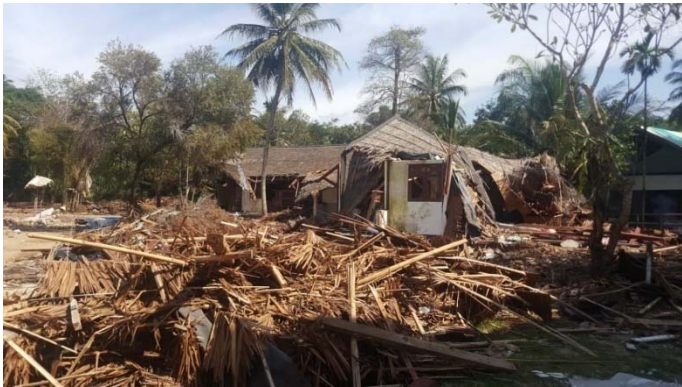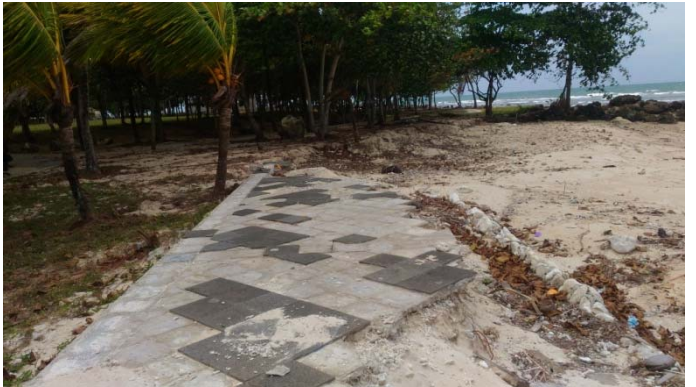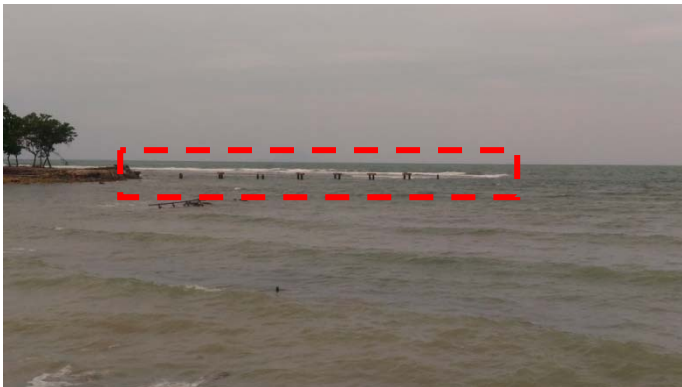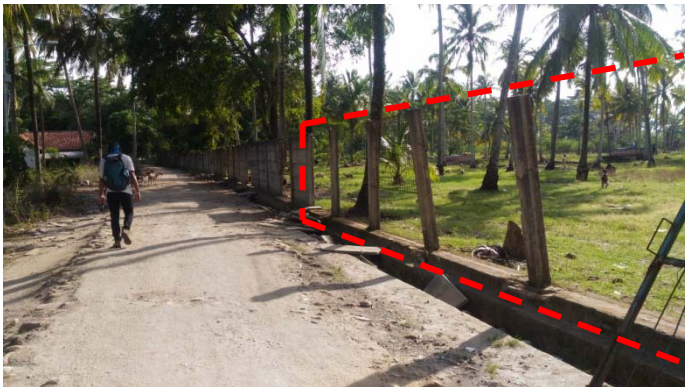



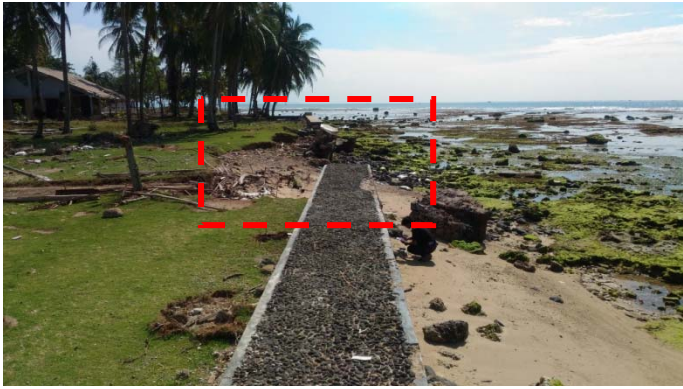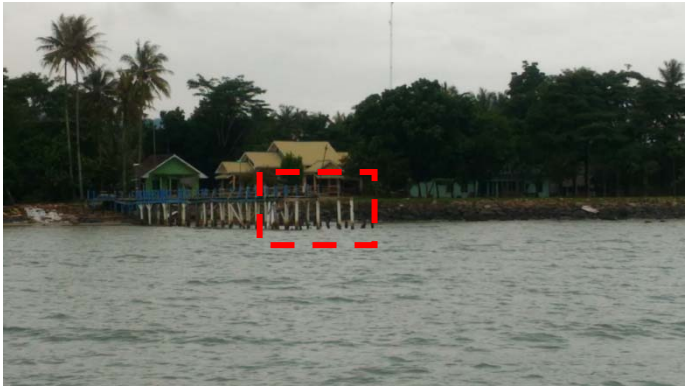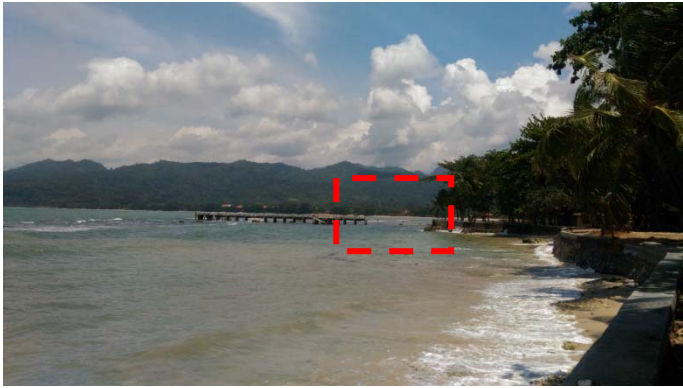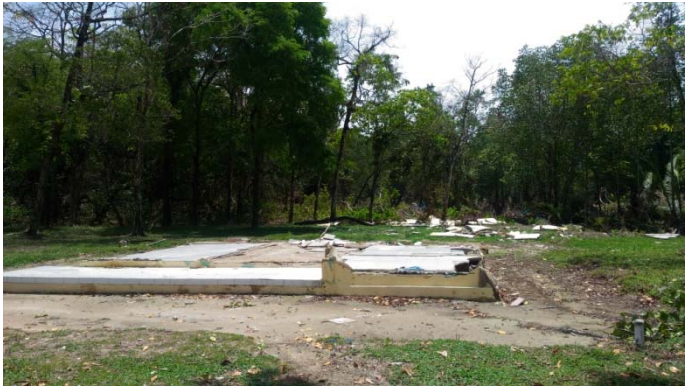

Tsunami direction evidences

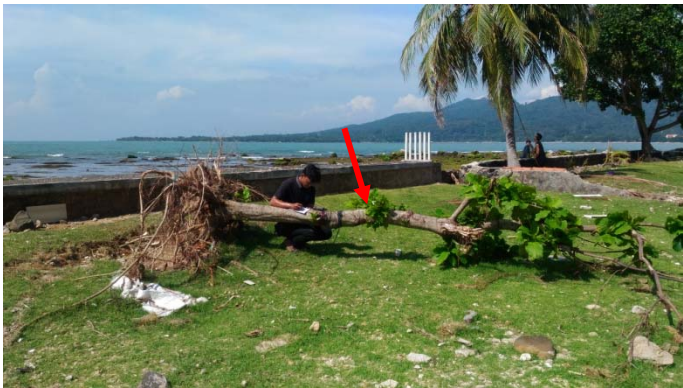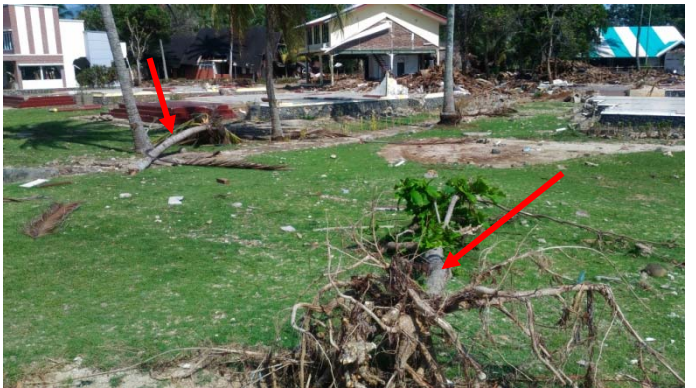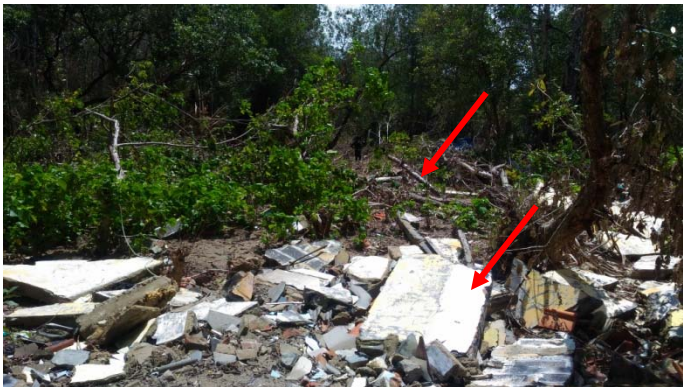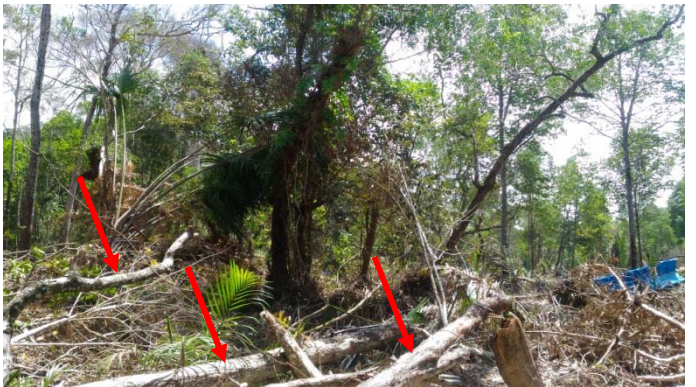



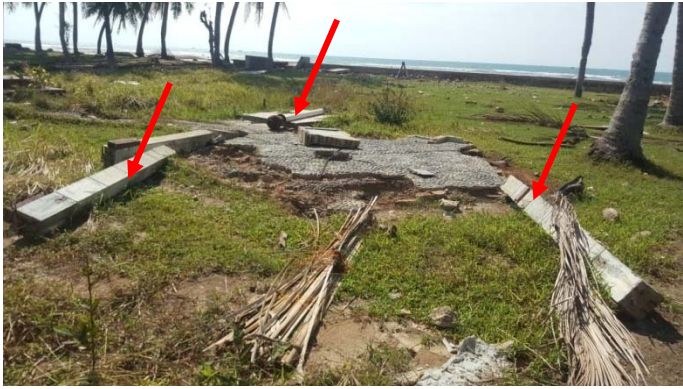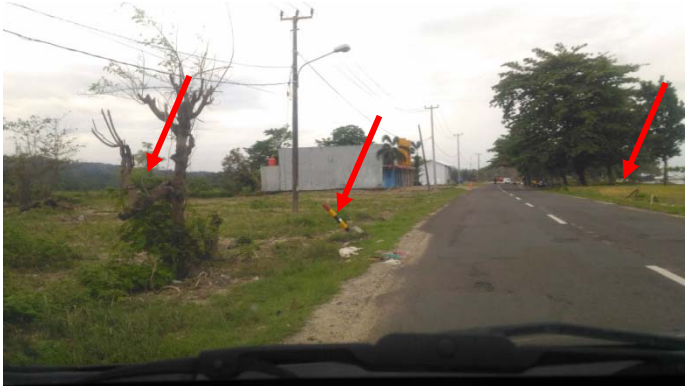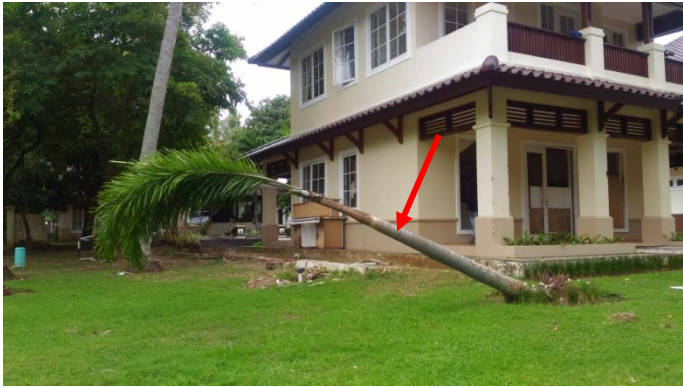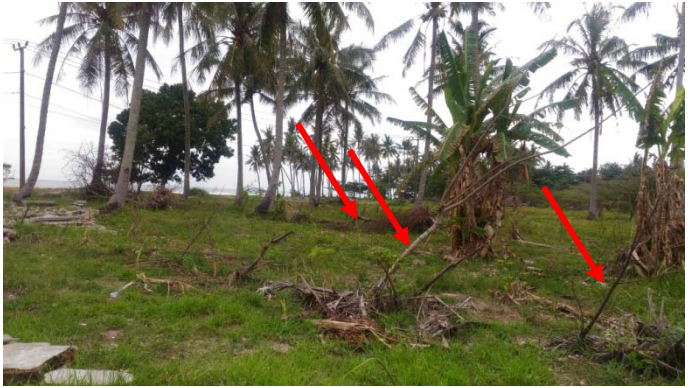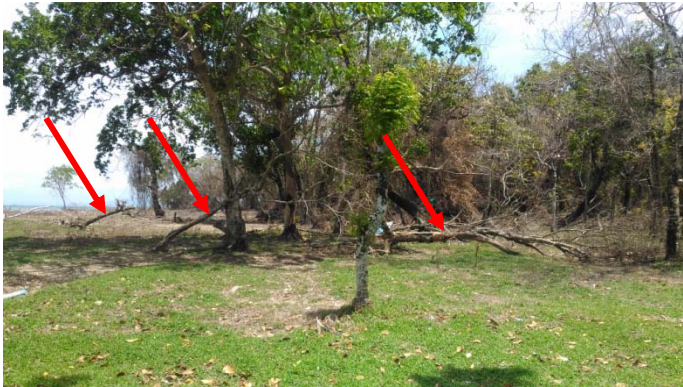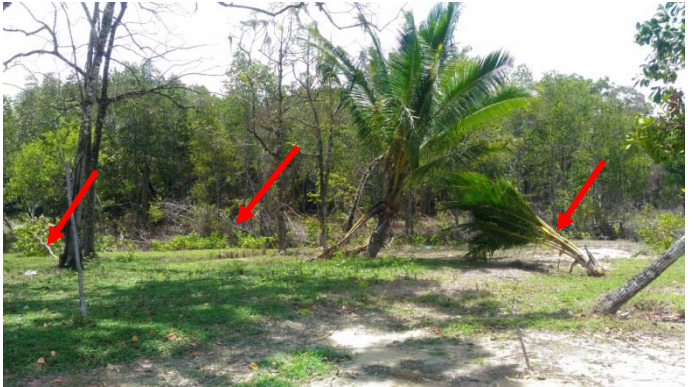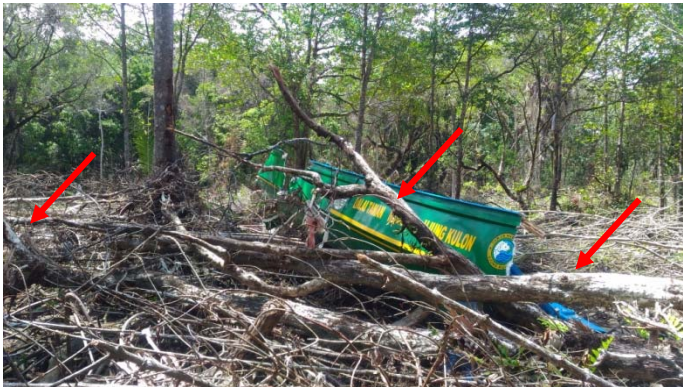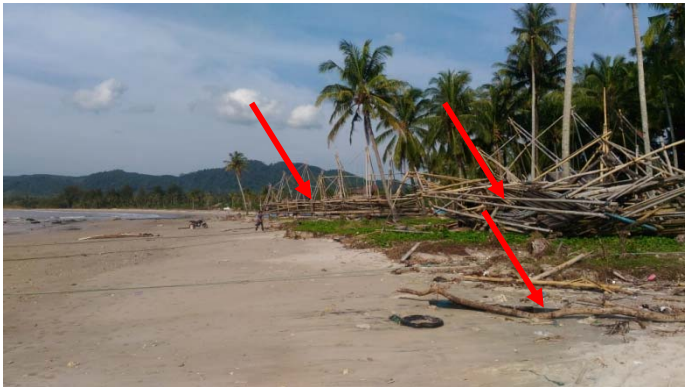



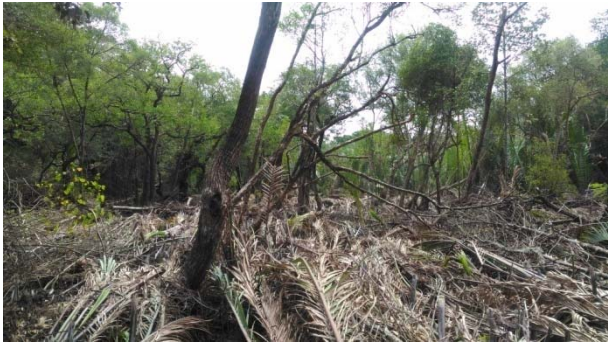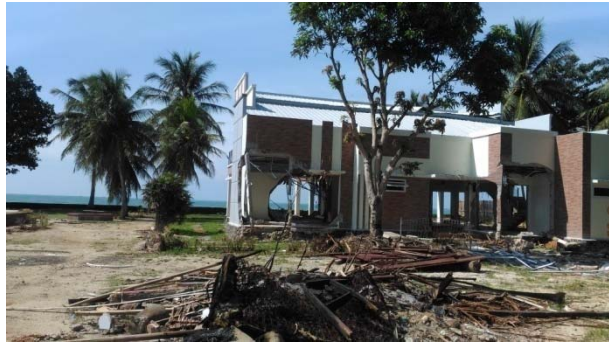

Flow depth and splash evidences (with additional information from eyewitnesses)

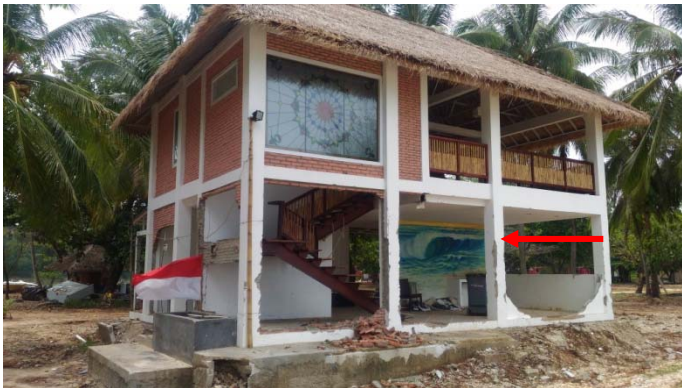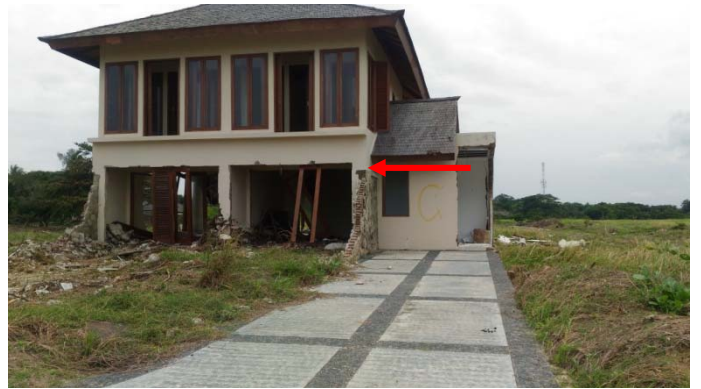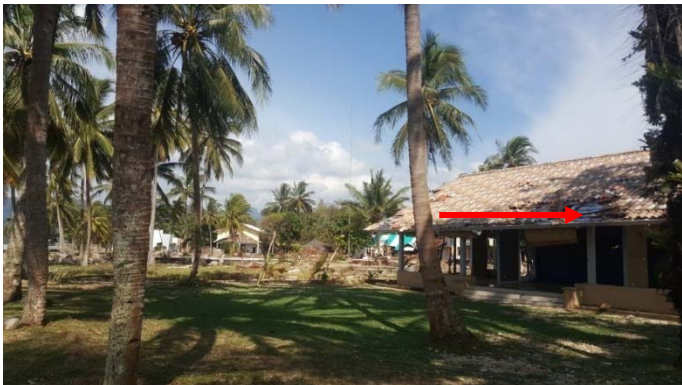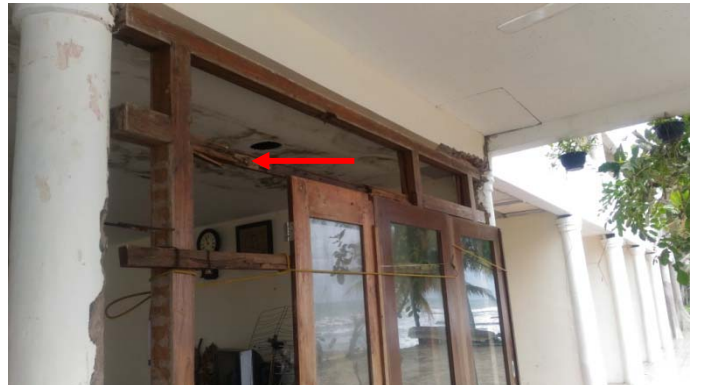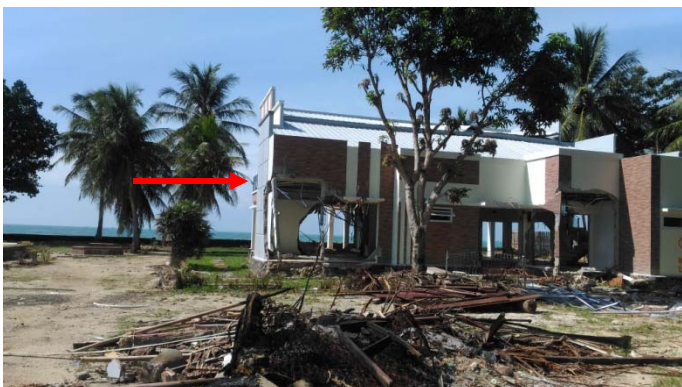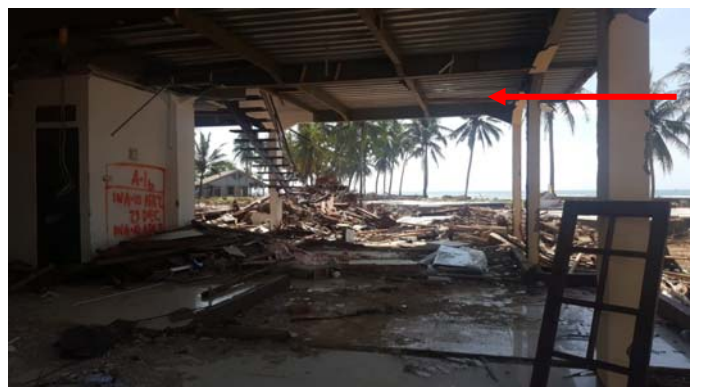



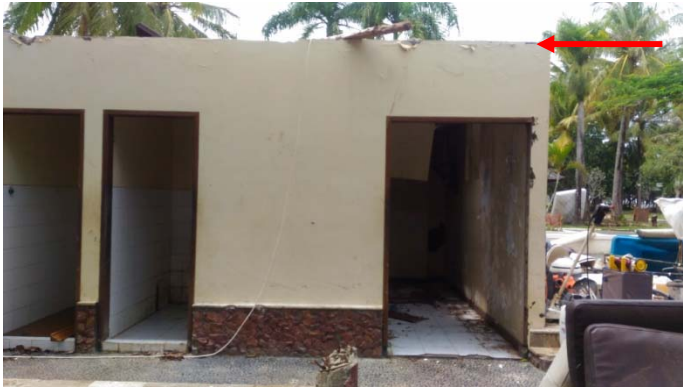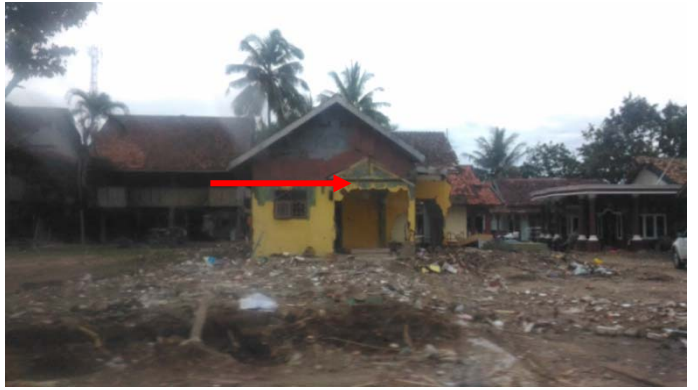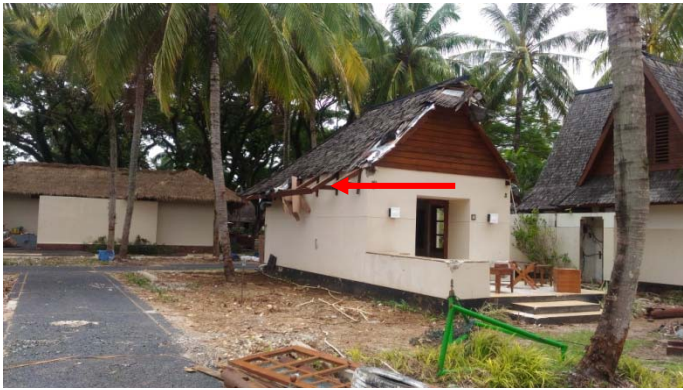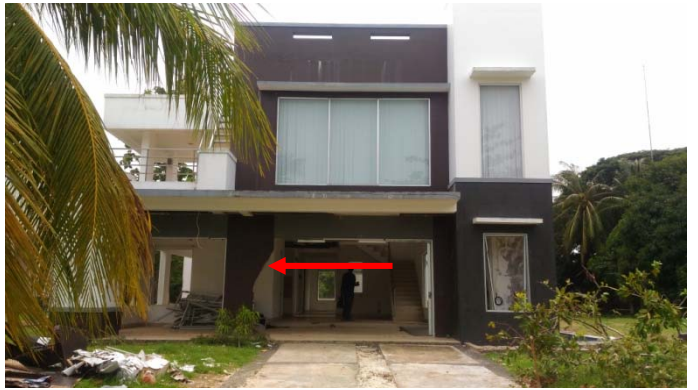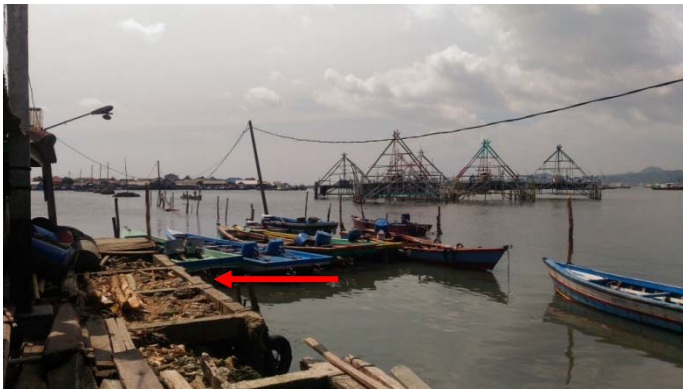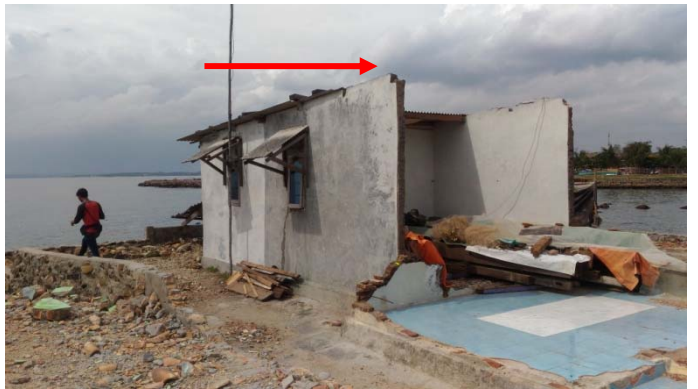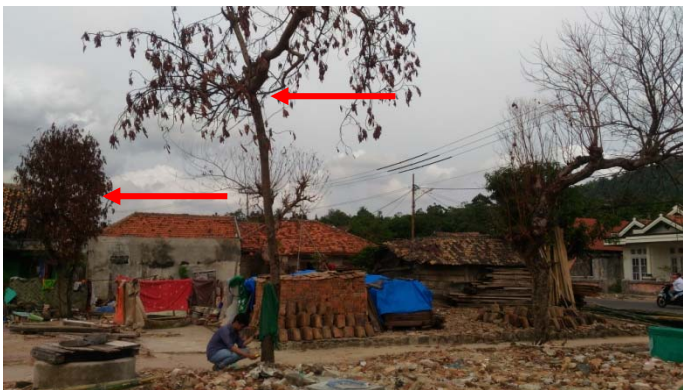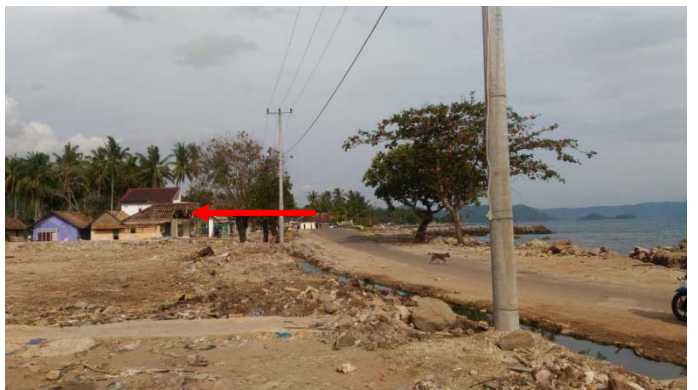



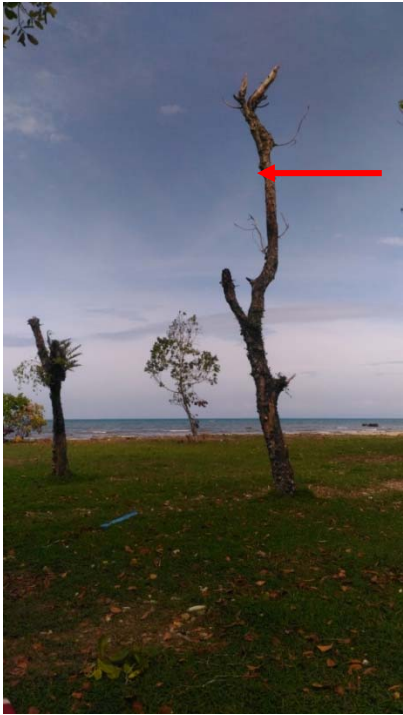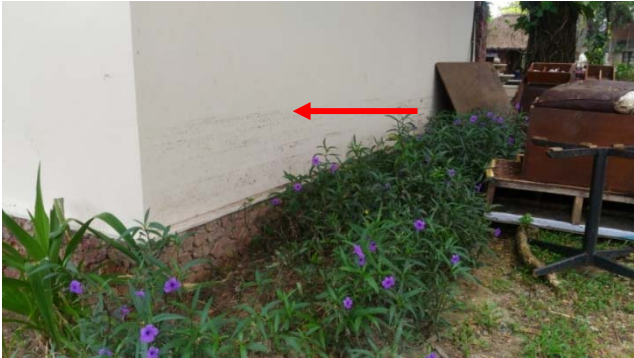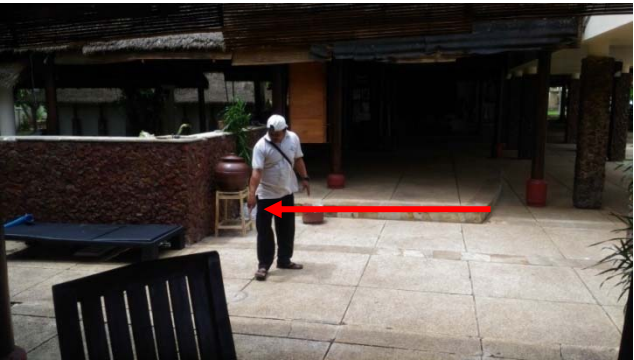

Interview with eyewitnesses

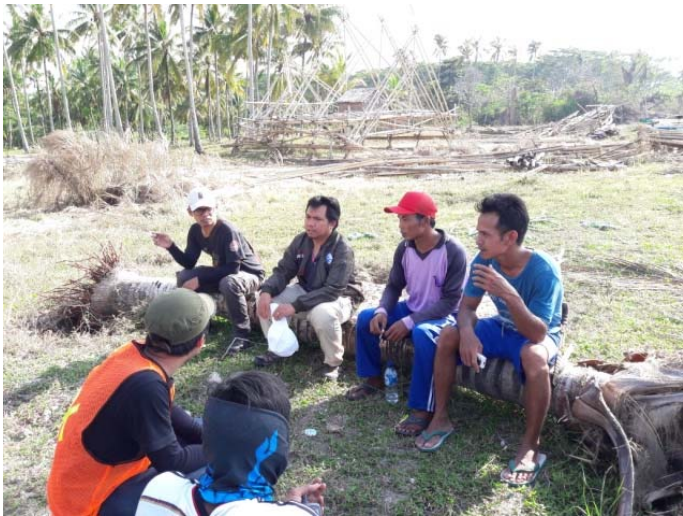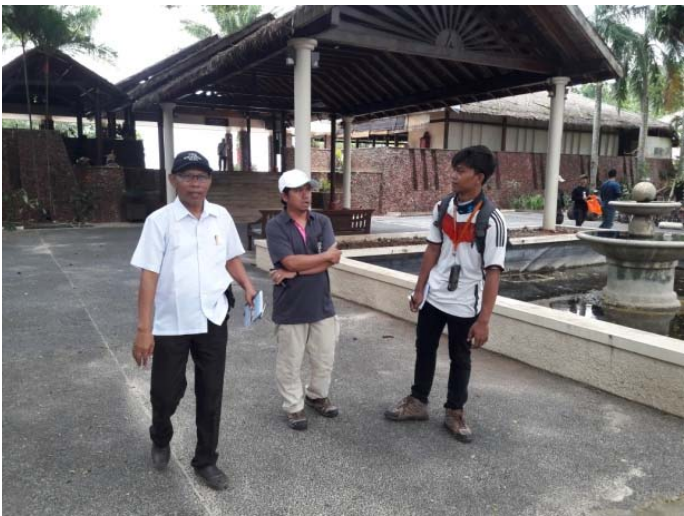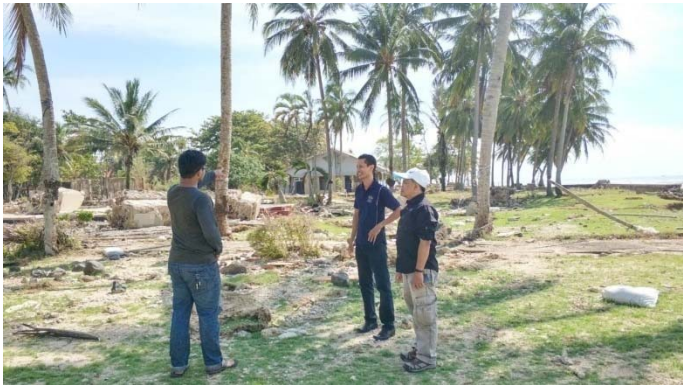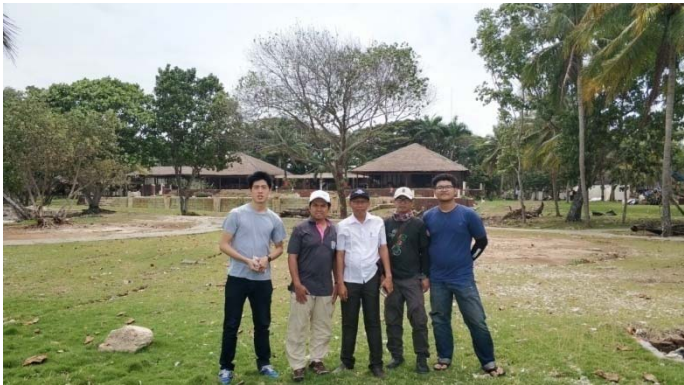



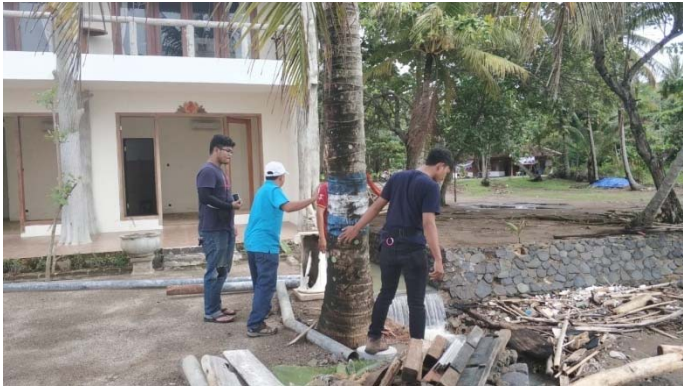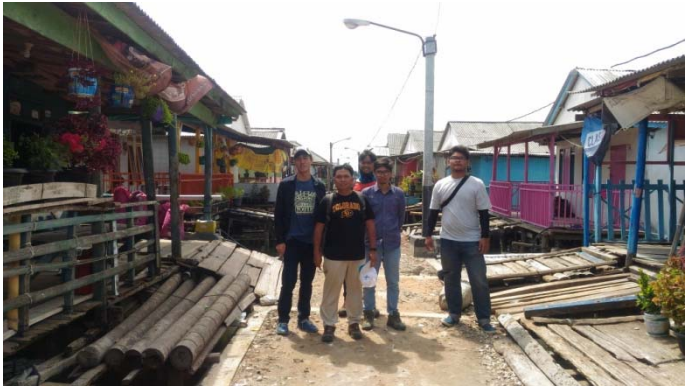

Supplement: Supplementary file 1 [file nhess-20-933-2020-supplement.pdf]
